# Supplementary material
Source: PubMed Central journal article supplement (PMC8040799)
Supplement: pnas.2021016118.sapp.pdf [file pnas.2021016118.sapp.pdf]

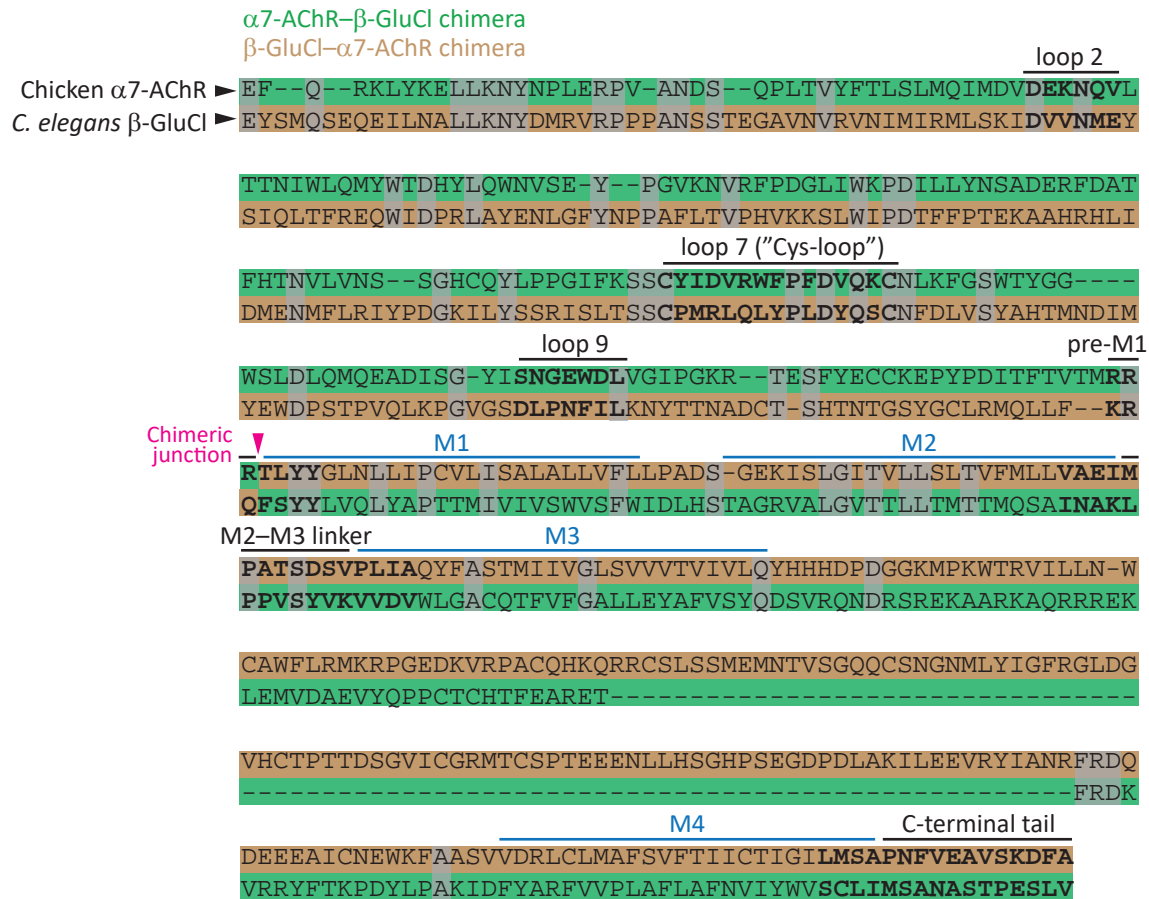

**Fig. S1.** Alignment of  $\alpha$ 7-AChR and  $\beta$ -GluCl sequences. The top sequence corresponds to the  $\alpha$ 7-AChR from chicken, and the bottom one corresponds to  $\beta$ -GluCl from *C. elegans*. The sequence of the  $\alpha$ 7-AChR- $\beta$ -GluCl ECD-TMD chimera is indicated with a green background, and that of the reverse construct is indicated with a dark-yellow background; identical residues are indicated with a superimposed gray background. Residues that, on the basis of atomic models of other pLGICs, are expected to be at the ECD-TMD interface are indicated in bold. The alignment was generated in ClustalW using 15 sequences that (in addition to those of the chicken  $\alpha$ 7-AChR and *C. elegans*  $\beta$ -GluCl) also included *C. elegans*  $\alpha$ 1-GluCl; mouse  $\alpha$ 1-,  $\beta$ 1-,  $\delta$ -, and  $\varepsilon$ -AChR; mouse 5-HT<sub>3A</sub>R; rat  $\alpha$ 1-,  $\beta$ 1-, and  $\gamma$ 2- $\gamma$ -aminobutyric-acid type-A receptor; rat  $\alpha$ 1- and  $\beta$ -GlyR; and the bacterial GLIC and ELIC. Disregarding the highly variable M3-M4 linker, the sequences of chicken  $\alpha$ 7-AChR and *C. elegans*  $\beta$ -GluCl are 17.7 % identical (28.6 % similar). For comparison, the mouse-muscle AChR (the average of the four adult-type subunits) and the bacterial pLGIC GLIC are 19 % identical (33 % similar); the mouse-muscle AChR and the—also bacterial—ELIC are 16.9 % identical (30.4 % similar); and GLIC and ELIC are 20.5 % identical (35.8 % similar). For all pairwise sequence comparisons, the identity and similarity are higher when calculated only for the structural elements at the ECD-TMD interface.

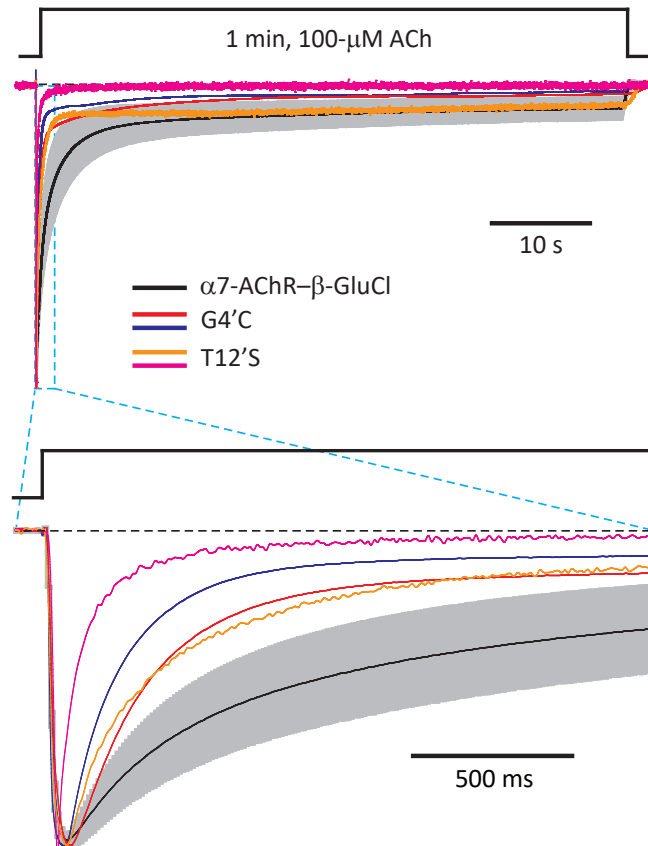

**Fig. S2.** Mutations in M2 speed up desensitization of the  $\alpha 7$ -AChR- $\beta$ -GluCl CS chimera. Much as they do in the background of the PPSV  $\rightarrow$  AAAA mutant, the M2 mutations G4'C and T12'S accelerated the time course of entry into desensitization of the CS construct. Normalized inward currents recorded in the whole-cell configuration under asymmetrical KCl-concentration conditions in response to the application of 1-min pulses of 100- $\mu$ M ACh. The membrane potential was  $\sim -60$  mV. Black dashed lines denote the zero-current baseline. Two representative responses from each mutant are shown. Each displayed response was recorded from a different cell. For comparison, the averaged response (mean  $\pm$  1SD) of the CS chimera (without any additional mutation) to 1-min pulses of 100- $\mu$ M ACh is also shown, as in Fig. 2D (mean: black solid line; SD: gray error bars).

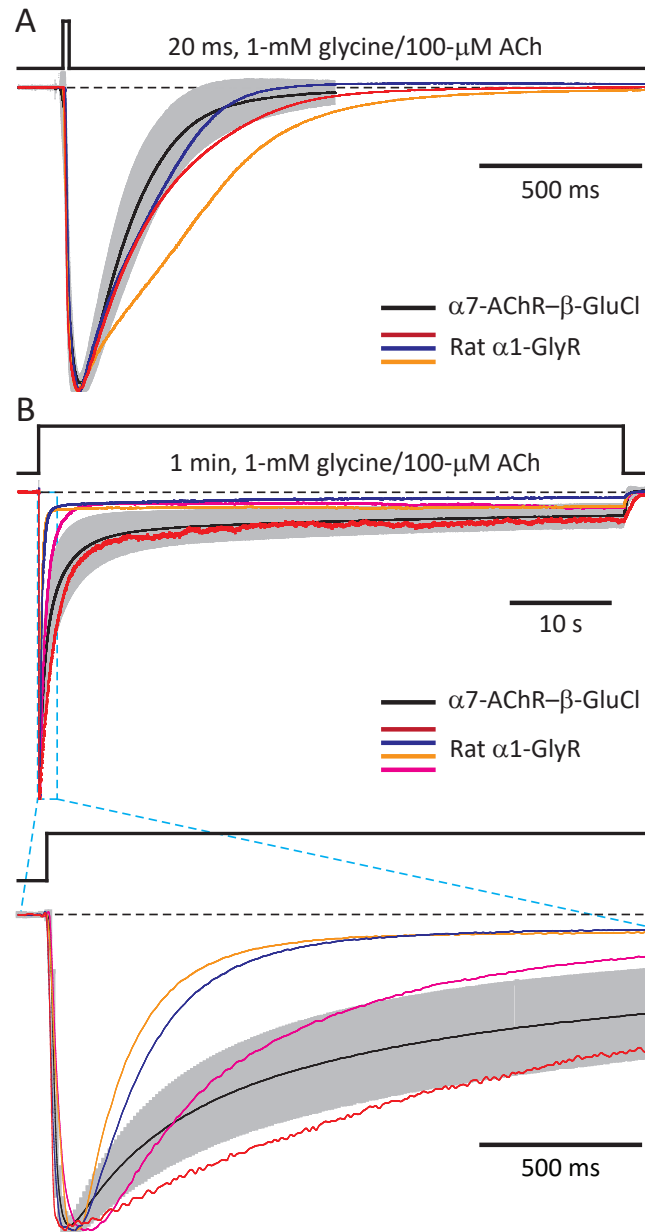

**Fig. S3.** The gating kinetics of the  $\alpha 7$ -AChR- $\beta$ -GluCl CS chimera are similar to those of the rat  $\alpha 1$ -GlyR. Normalized inward currents recorded from the rat  $\alpha 1$ -GlyR in the whole-cell configuration under asymmetrical KCl-concentration conditions in response to the application of 20-ms or 1-min pulses of 1-mM glycine. The membrane potential was  $\sim -60$  mV. Black dashed lines denote the zero-current baseline. (A, B) Three representative responses to 20-ms pulses, and four to 1-min pulses, are shown. Each displayed response was recorded from a different cell. For comparison, the averaged responses (mean  $\pm$  1SD) of the CS chimera (without any additional mutation) to 20-ms or 1-min pulses of 100- $\mu$ M ACh are also shown, as in Fig. 2 C and D (mean: black solid line; SD: gray error bars).

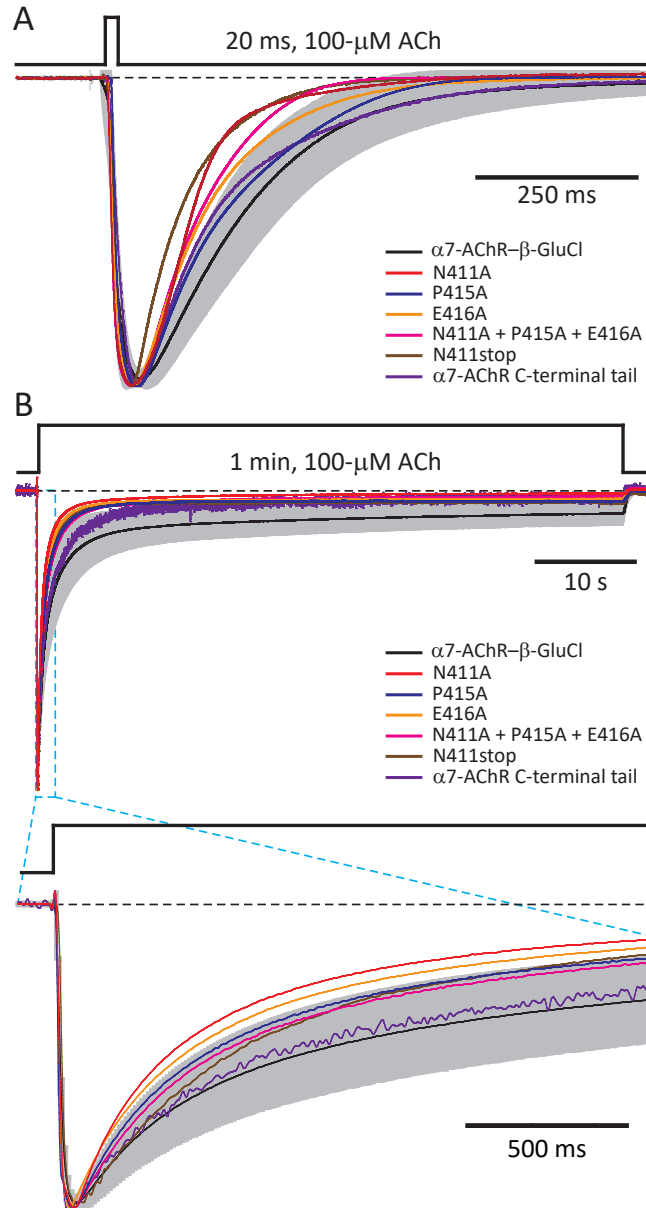

**Fig. S4.** Probing the effect of mutations to the C-terminal tail on gating. Normalized inward currents recorded from the indicated CS-chimera mutants in the whole-cell configuration under asymmetrical KCl-concentration conditions in response to the application of 20-ms or 1-min pulses of 100- $\mu$ M ACh. The membrane potential was  $\sim$ -60 mV. Black dashed lines denote the zero-current baseline. (A, B) One representative response from each mutant is shown. For comparison, the averaged responses (mean  $\pm$  1SD) of the CS chimera (without any additional mutation) to 20-ms or 1-min pulses of 100- $\mu$ M ACh are also shown, as in Fig. 2 C and D (mean: black solid line; SD: gray error bars).

**Table S1. Characterization of  $\alpha$ 7-AChR- $\beta$ -GluCl CS-chimera mutations**

| Structural element/<br>wild-type sequence              | Mutation(s)                           | Mutated sequence*                                                                                                          | Function <sup>†</sup> | Cell-surface expression<br>mutant-to-CS ratio<br>(mean $\pm$ SE) (replicates) |
|--------------------------------------------------------|---------------------------------------|----------------------------------------------------------------------------------------------------------------------------|-----------------------|-------------------------------------------------------------------------------|
| <b>Loop 2</b><br>D <sup>66</sup> EKNQV                 | D66A + E67A + N69A + Q70A             | <u>A</u> <sup>66</sup> AKAAV                                                                                               | Yes                   | 0.011 $\pm$ 0.0068 (4)                                                        |
|                                                        | $\beta$ -GluCl loop 2                 | D <sup>66</sup> <u>V</u> VNME                                                                                              | Yes                   | 1.3 $\pm$ 0.078 (4)                                                           |
| <b>Loop 7</b><br>C <sup>150</sup> YIDVRWFPFDVQKC       | W156A                                 | C <sup>150</sup> YIDVR <u>A</u> FPFDVQKC                                                                                   | Yes                   | 0.69 $\pm$ 0.057 (4)                                                          |
|                                                        | F157A                                 | C <sup>150</sup> YIDVRW <u>A</u> FPFDVQKC                                                                                  | No                    | 0.35 $\pm$ 0.11 (12)                                                          |
|                                                        | P158A                                 | C <sup>150</sup> YIDVRWFAFDVQKC                                                                                            | No                    | Undetectable (4)                                                              |
|                                                        | P158Q                                 | C <sup>150</sup> YIDVRW <u>F</u> QFDVQKC                                                                                   | No                    | 0.0052 $\pm$ 0.00075 (4)                                                      |
|                                                        | P158G                                 | C <sup>150</sup> YIDVRW <u>F</u> GFDVQKC                                                                                   | No                    | 0.010 $\pm$ 0.0038 (4)                                                        |
|                                                        | D160A                                 | C <sup>150</sup> YIDVRWFP <u>F</u> AVQKC                                                                                   | Yes                   | 0.047 $\pm$ 0.012 (4)                                                         |
|                                                        | Q162A                                 | C <sup>150</sup> YIDVRWFPFDV <u>A</u> KC                                                                                   | Yes                   | 0.71 $\pm$ 0.062 (4)                                                          |
|                                                        | D160A + Q162A                         | C <sup>150</sup> YIDVRWFP <u>F</u> <u>A</u> <u>V</u> <u>A</u> KC                                                           | No                    | 0.0096 $\pm$ 0.0041 (4)                                                       |
|                                                        | $\beta$ -GluCl Cys-loop               | C <sup>150</sup> <u>P</u> MRLQLY <u>P</u> L <u>D</u> Y <u>Q</u> S <u>C</u>                                                 | Yes                   | 0.15 $\pm$ 0.010 (4)                                                          |
| <b>Loop 9</b><br>S <sup>192</sup> NGEWDL               | N193A                                 | S <sup>192</sup> <u>A</u> GEWDL                                                                                            | Yes                   | 0.54 $\pm$ 0.019 (4)                                                          |
|                                                        | G194A                                 | S <sup>192</sup> N <u>A</u> EWDL                                                                                           | Yes                   | 1.2 $\pm$ 0.15 (4)                                                            |
|                                                        | E195A                                 | S <sup>192</sup> NG <u>A</u> WDL                                                                                           | Yes                   | 0.33 $\pm$ 0.0088 (4)                                                         |
|                                                        | W196A                                 | S <sup>192</sup> NGE <u>A</u> DL                                                                                           | No                    | 0.0025 $\pm$ 0.0017 (4)                                                       |
|                                                        | G194P + E195N + W196F                 | S <sup>192</sup> <u>N</u> <u>P</u> <u>N</u> <u>F</u> DL                                                                    | No                    | 0.084 $\pm$ 0.0026 (4)                                                        |
|                                                        | L198A                                 | S <sup>192</sup> NGEWD <u>A</u>                                                                                            | Yes                   | 0.053 $\pm$ 0.0046 (4)                                                        |
| <b>Pre-M1 linker</b><br>R <sup>227</sup> RR            | R227A + R229A                         | <u>A</u> <sup>227</sup> RA                                                                                                 | Yes                   | 0.018 $\pm$ 0.0029 (4)                                                        |
|                                                        | $\beta$ -GluCl pre-M1                 | <u>K</u> <sup>227</sup> R <u>Q</u>                                                                                         | Yes                   | 0.17 $\pm$ 0.010 (4)                                                          |
|                                                        | R228A                                 | R <sup>227</sup> <u>A</u> R                                                                                                | No                    | 0.0023 $\pm$ 0.00019 (4)                                                      |
|                                                        | Arg insertion                         | R <sup>227</sup> <u>R</u> <u>R</u> <u>R</u>                                                                                | No                    | 0.66 $\pm$ 0.0084 (4)                                                         |
| <b>N-terminus of M1</b><br>F <sup>230</sup> SY         | Y232A + Y233A                         | F <sup>230</sup> <u>S</u> <u>A</u> A                                                                                       | Yes                   | 0.78 $\pm$ 0.055 (4)                                                          |
| <b>M2-M3 linker</b><br>L <sup>284</sup> PPVSYVK        | P285A + P286A + S288A + V290A         | L <sup>284</sup> <u>A</u> <u>A</u> <u>V</u> <u>A</u> <u>Y</u> <u>A</u> <u>K</u>                                            | Yes                   | 0.53 $\pm$ 0.056 (4)                                                          |
|                                                        | $\alpha$ 7-AChR M2-M3 linker          | <u>M</u> <sup>284</sup> <u>P</u> <u>A</u> <u>T</u> <u>S</u> <u>D</u> <u>S</u> <u>V</u>                                     | No                    | 1.5 $\pm$ 0.10 (4)                                                            |
|                                                        | $\alpha$ 7-AChR M2-M3 linker + D289K  | <u>M</u> <sup>284</sup> <u>P</u> <u>A</u> <u>T</u> <u>S</u> <u>K</u> <u>S</u> <u>V</u>                                     | No                    | 2.0 $\pm$ 0.083 (4)                                                           |
|                                                        | P285A + P286A + S288A + V290A + G266C | L <sup>284</sup> <u>A</u> <u>A</u> <u>V</u> <u>A</u> <u>Y</u> <u>A</u> <u>K</u> and M2 G4'C                                | Yes                   | 0.99 $\pm$ 0.075 (4)                                                          |
|                                                        | P285A + P286A + S288A + V290A + T274S | L <sup>284</sup> <u>A</u> <u>A</u> <u>V</u> <u>A</u> <u>Y</u> <u>A</u> <u>K</u> and M2 T12'S                               | Yes                   | 0.14 $\pm$ 0.014 (4)                                                          |
| <b>C-terminal tail</b><br>M <sup>408</sup> SANASTPESLV | N411A                                 | M <sup>408</sup> <u>S</u> <u>A</u> <u>A</u> ASTPESLV                                                                       | Yes                   | 1.2 $\pm$ 0.056 (3)                                                           |
|                                                        | P415A                                 | M <sup>408</sup> SANAST <u>A</u> ESLV                                                                                      | Yes                   | 1.4 $\pm$ 0.13 (3)                                                            |
|                                                        | E416A                                 | M <sup>408</sup> SANAST <u>P</u> ASLV                                                                                      | Yes                   | 1.0 $\pm$ 0.10 (3)                                                            |
|                                                        | N411A + P415A + E416A                 | M <sup>408</sup> <u>S</u> <u>A</u> <u>A</u> AST <u>A</u> ASLV                                                              | Yes                   | 1.1 $\pm$ 0.076 (3)                                                           |
|                                                        | N411stop                              | M <sup>408</sup> <u>S</u> A                                                                                                | Yes                   | 0.74 $\pm$ 0.036 (3)                                                          |
|                                                        | $\alpha$ 7-AChR C-terminal tail       | <u>P</u> <sup>408</sup> <u>N</u> <u>F</u> <u>V</u> <u>E</u> <u>A</u> <u>V</u> <u>S</u> <u>K</u> <u>D</u> <u>F</u> <u>A</u> | Yes                   | 0.27 $\pm$ 0.033 (3)                                                          |

\*Mutated residues are underlined.

<sup>†</sup>For some mutants, poor expression on the plasma membrane may underlie the failure to observe currents in response to ACh applications.
